# Supplementary material for: cSTAR analysis identifies endothelial cell cycle as a key regulator of flow-dependent artery remodeling
Source: PubMed Central journal article supplement — Sci Adv. 2025 Jan 3;11(1):eado9970. doi: 10.1126/sciadv.ado9970 (PMC11698091; doi:10.1126/sciadv.ado9970), 2025-01-03
Supplement: sciadv.ado9970_sm.pdf [file sciadv.ado9970_sm.pdf]

Supplementary Materials for  
**cSTAR analysis identifies endothelial cell cycle as a key regulator of flow-  
dependent artery remodeling**

Hanqiang Deng *et al.*

Corresponding author: Boris N. Kholodenko, [boris.kholodenko@ucd.ie](mailto:boris.kholodenko@ucd.ie); Martin A. Schwartz,  
[martin.schwartz@yale.edu](mailto:martin.schwartz@yale.edu)

*Sci. Adv.* **11**, eado9970 (2025)  
DOI: 10.1126/sciadv.ado9970

**The PDF file includes:**

Figs. S1 to S5  
Legends for tables S1 to S5

**Other Supplementary Material for this manuscript includes the following:**

Tables S1 to S5

## Supplementary Figure Legends

**Figure S1. Leukocytes recruitment under LSS and OSS in vivo.** (A) Heatmap of log<sub>2</sub> fold changes in expression of chemokines that preferentially attract macrophages (CCL2) vs neutrophils (CXCL2 and CXCL8) in PSS, LSS and OSS conditions. (B) Left common carotid artery (LCA) ligation to generate low shear stress (LSS): external carotid artery (ECA) and superior thyroid artery (STA) were ligated, leaving internal carotid artery (ICA) and occipital artery (OA) open. (C) Left common carotid artery (LCA) ligation to generate oscillatory shear stress (OSS): ECA, STA, ICA and OA were ligated. (D and E) Representative images (D) and quantification (E) of anti-Myeloperoxidase (MPO, neutrophil marker) on RCA and LCA sections from LSS and OSS models. (F and G) Representative images (F) and quantification (G) of F4/80 (macrophage marker) on RCA and LCA sections from LSS and OSS models, n=6 mice per group. Scale bars, 25 μm. L, lumen. Data are presented as mean ± s.e.m. \*\*\**P* < 0.001, ns: not significant, calculated by two-way ANOVA with Tukey's multiple comparison.

**Figure S2. CDK2 depletion induces early G1 arrest under OSS.** Fucci HUVECs were transfected with control (siCtrl) or CDK2 (siCDK2) siRNA for 3 days, and then were subjected to OSS or Static for 24 hours. (A) Cells were fixed and mounted with DAPI (4',6-diamidino-2-phenylindole). Representative images are showed. Scale bars, 100 μm. (B) Quantification of cell cycle state, n=5 experiments, data are presented as mean ± s.e.m. \*\*\**P* < 0.001, ns: not significant, calculated by two-way ANOVA with Tukey's multiple comparison.

**Figure S3. Lung histology images.** (A) H&E (Hematoxylin & Eosin) staining of Ctrl and CDK2 iECKO lung sections. V, vessels. Arrowheads are narrowed and occlusive vessels.

**Figure S4. Activation of Smad2/3 in CDK2 ECKO lung tissue.** (A and B) Representative images and quantification of p-Smad2 Ser465/467 (A) and p-Smad3 Ser423/425 (B) in lung sections from Ctrl and CDK2 iECKO mice, n=6 mice per group. Scale bars, 25 μm. Data are presented as mean ± s.e.m. \*\*\**P* < 0.001, calculated by two-tailed unpaired t tests. (C) cSTAR-predicted global responses of the TGFβR

pathway activity to perturbations of all other core network modules, except TGF $\beta$ R itself. A negative global response of TGF $\beta$ R to CDK2 implies that CDK2 inhibition will activate the TGF $\beta$ R pathway.

**Figure S5. Body weight and plasma lipid analysis.** (A and B) Body weight, plasma total cholesterol, and triglyceride levels between male (A) and female (B) Ctrl and CDK2 iECKO mice. N=6 mice per group per gender, data are presented as mean  $\pm$  s.e.m. ns: not significant, calculated by two-tailed unpaired t tests.

# Figure S1

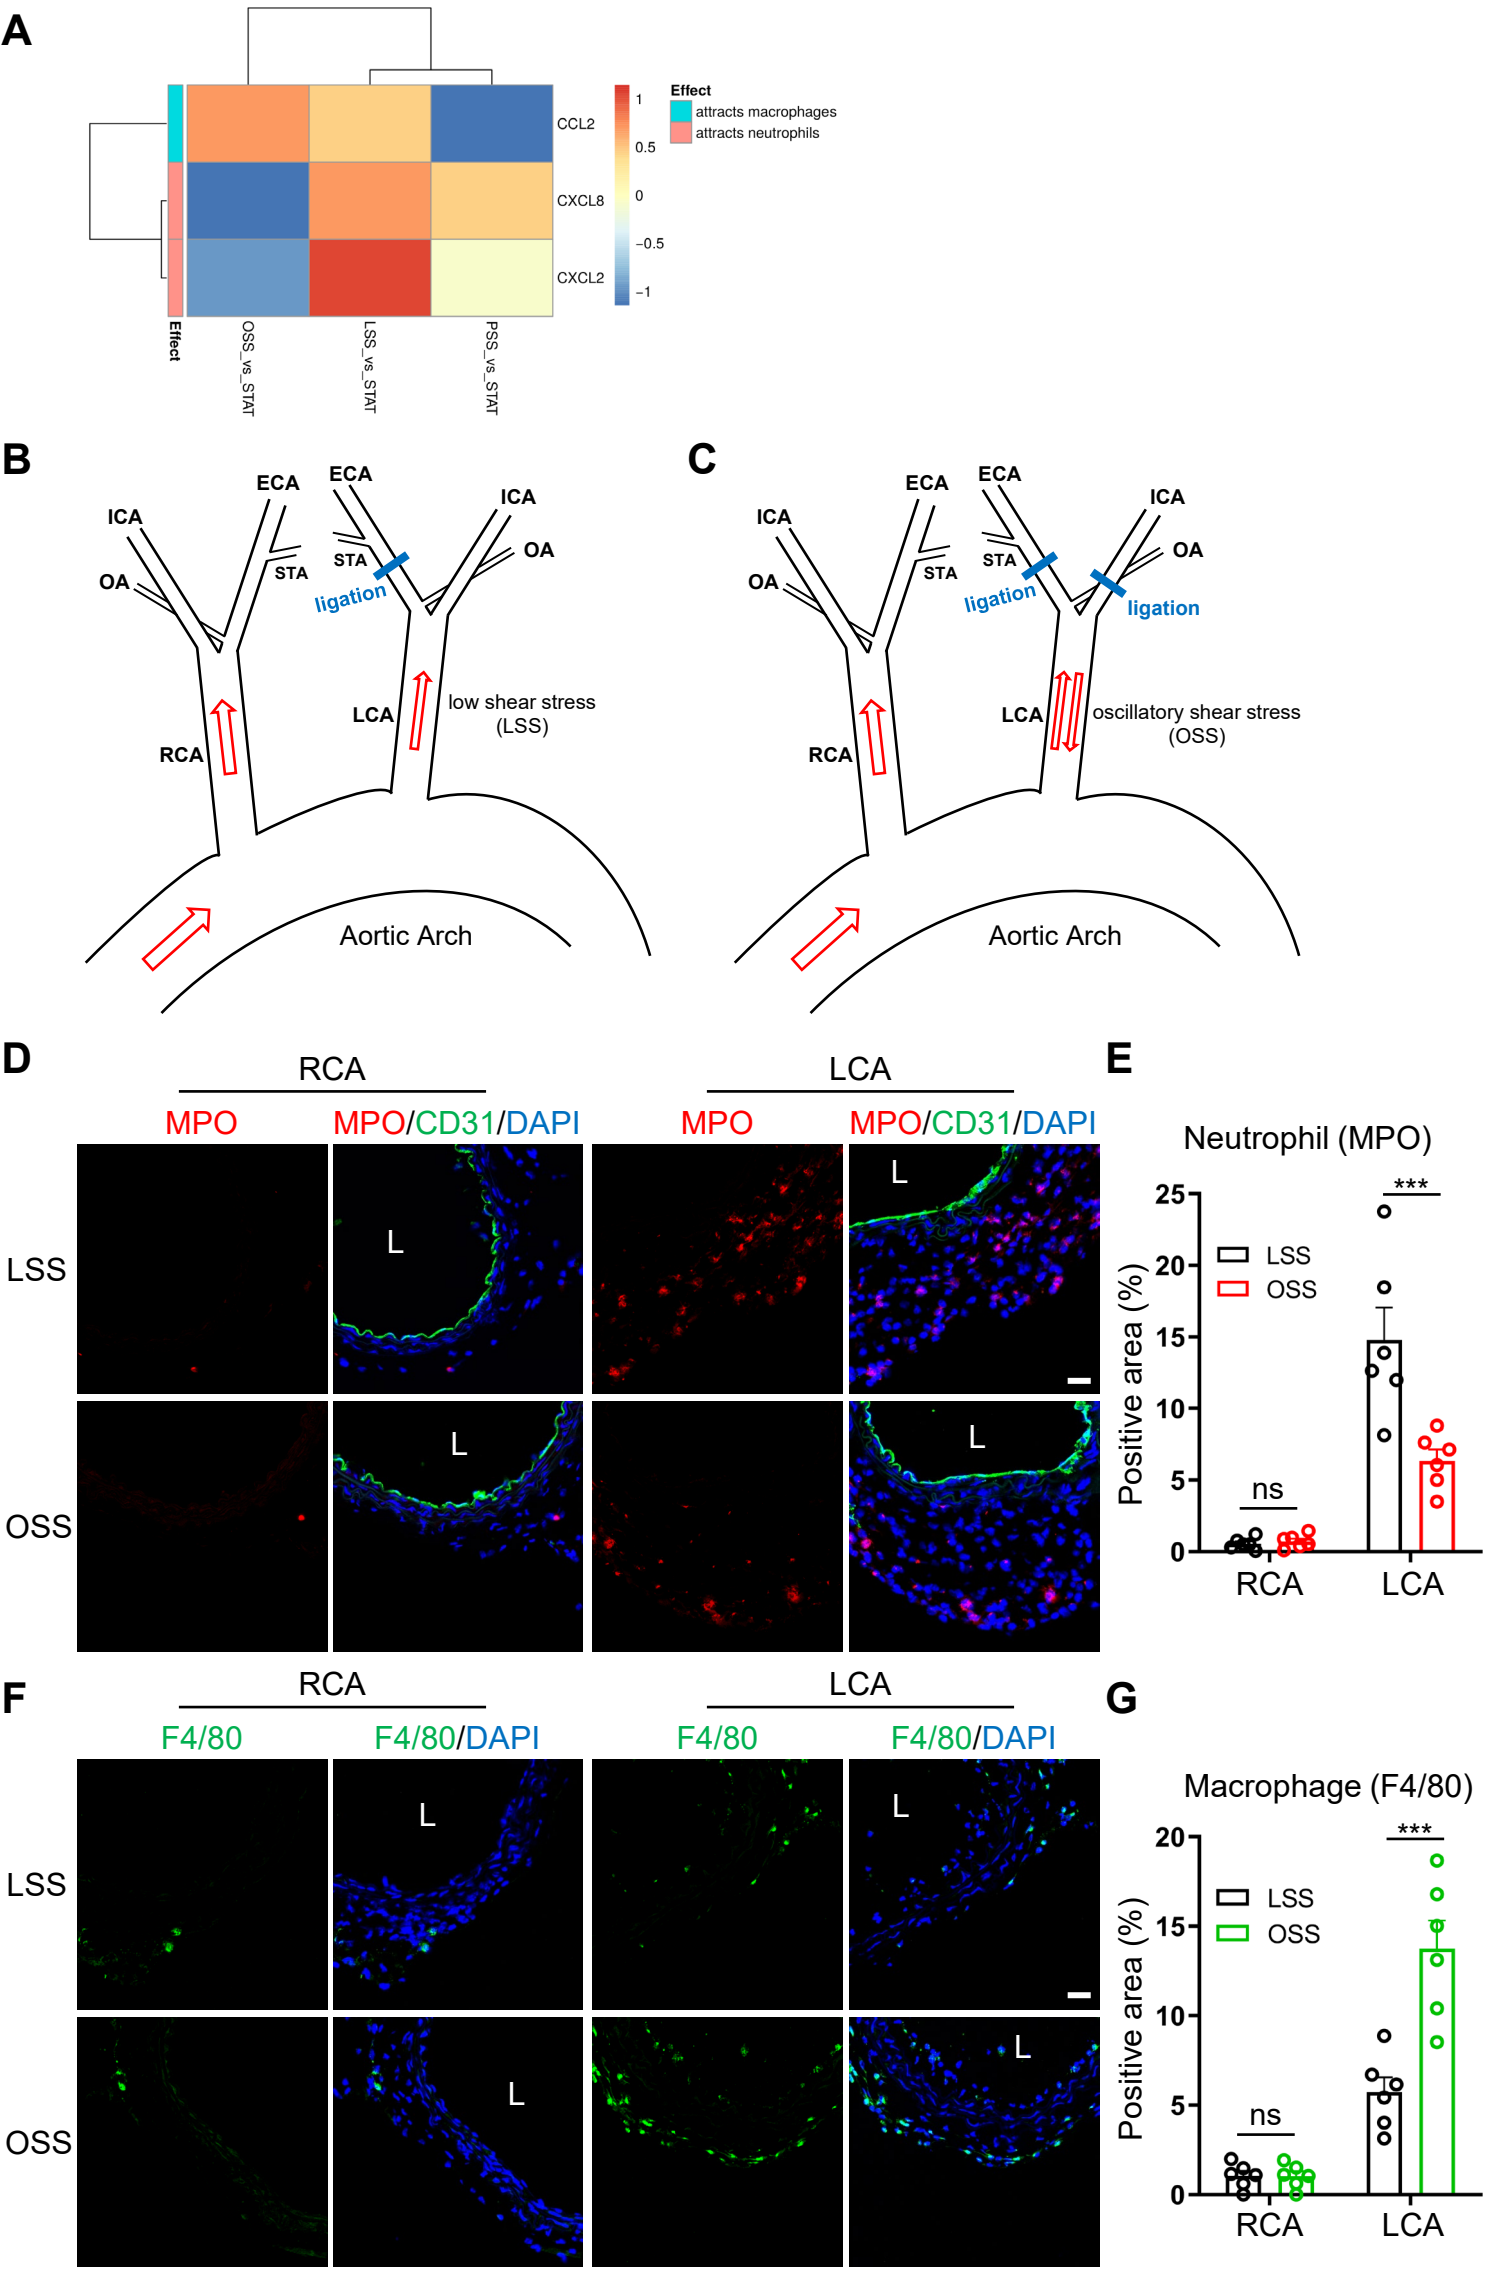

# Figure S2

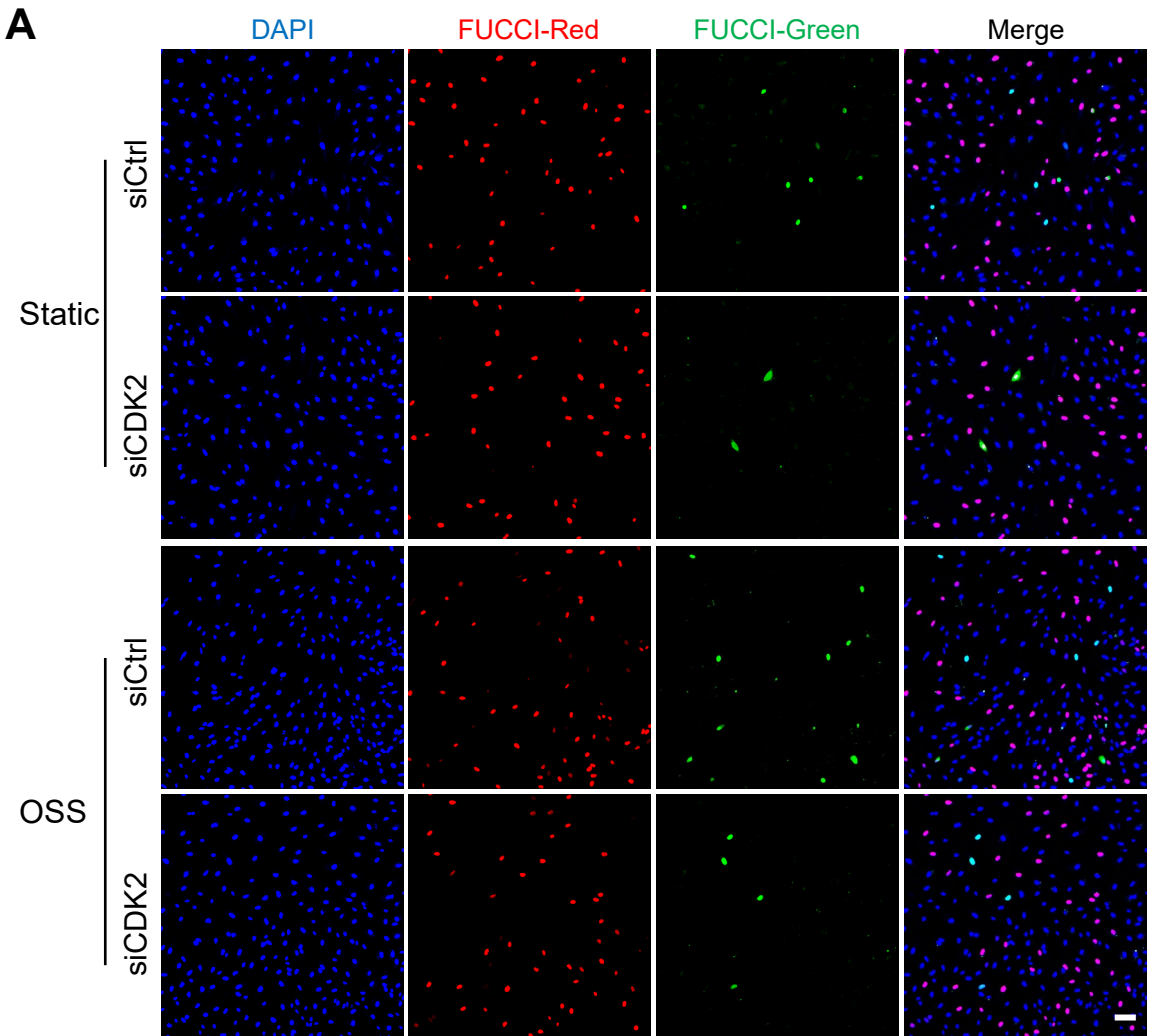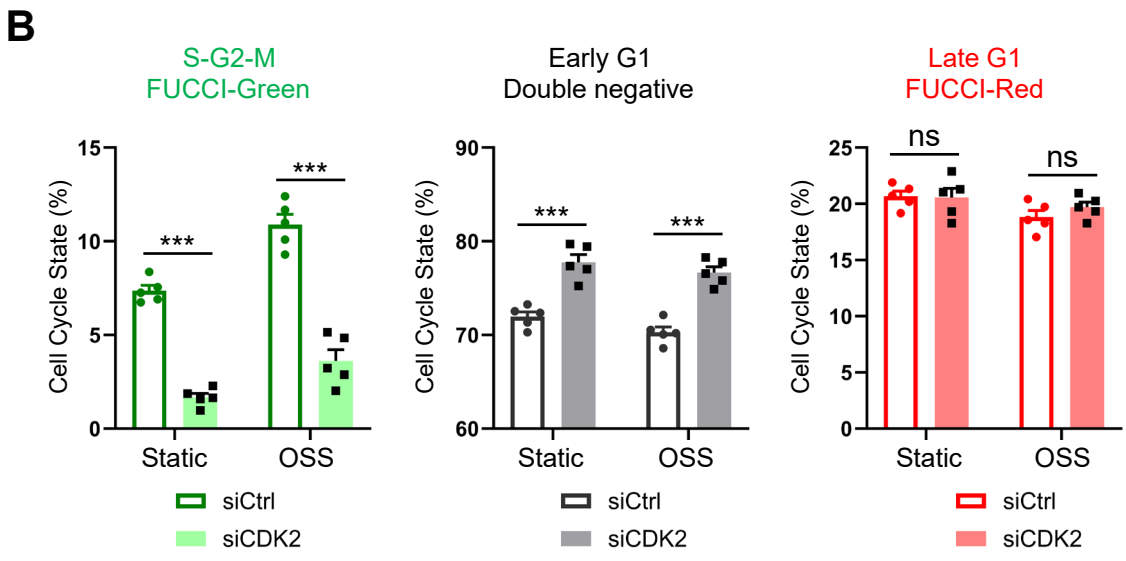

**Figure S3**

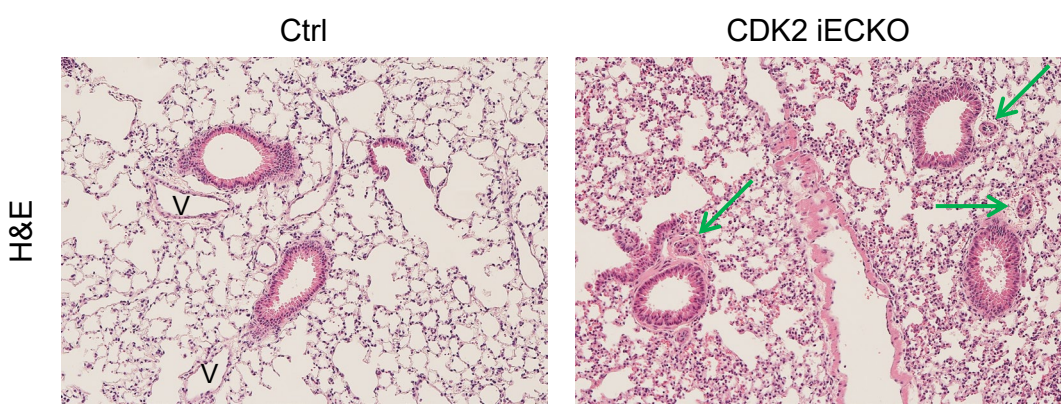

**Figure S4**

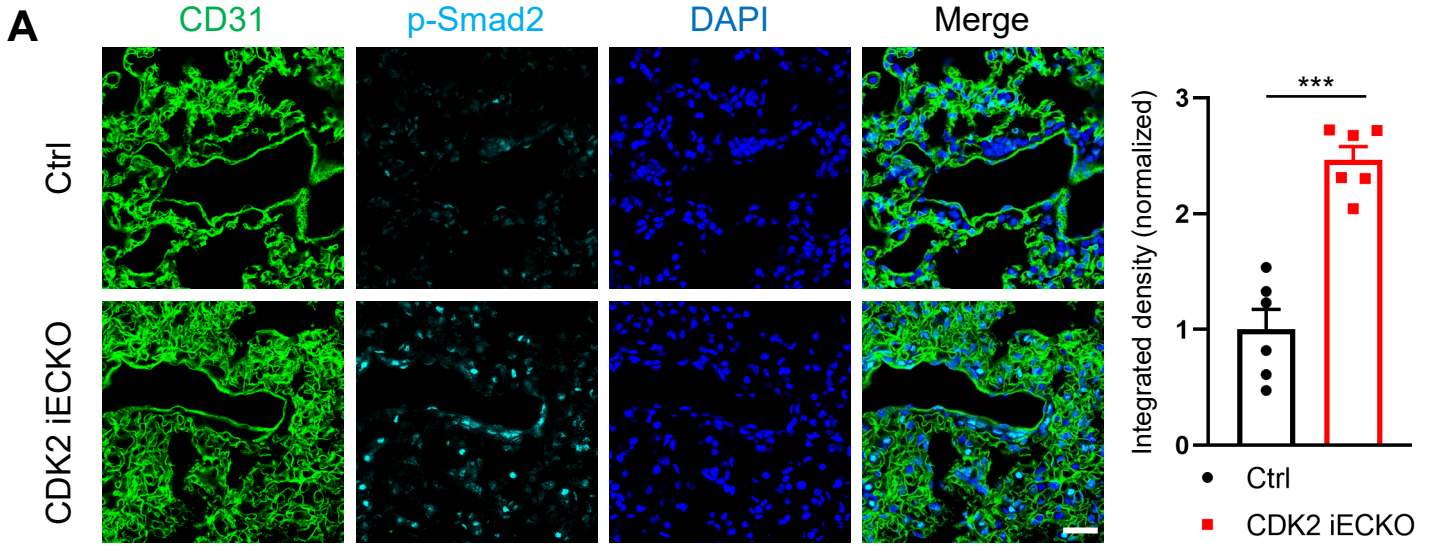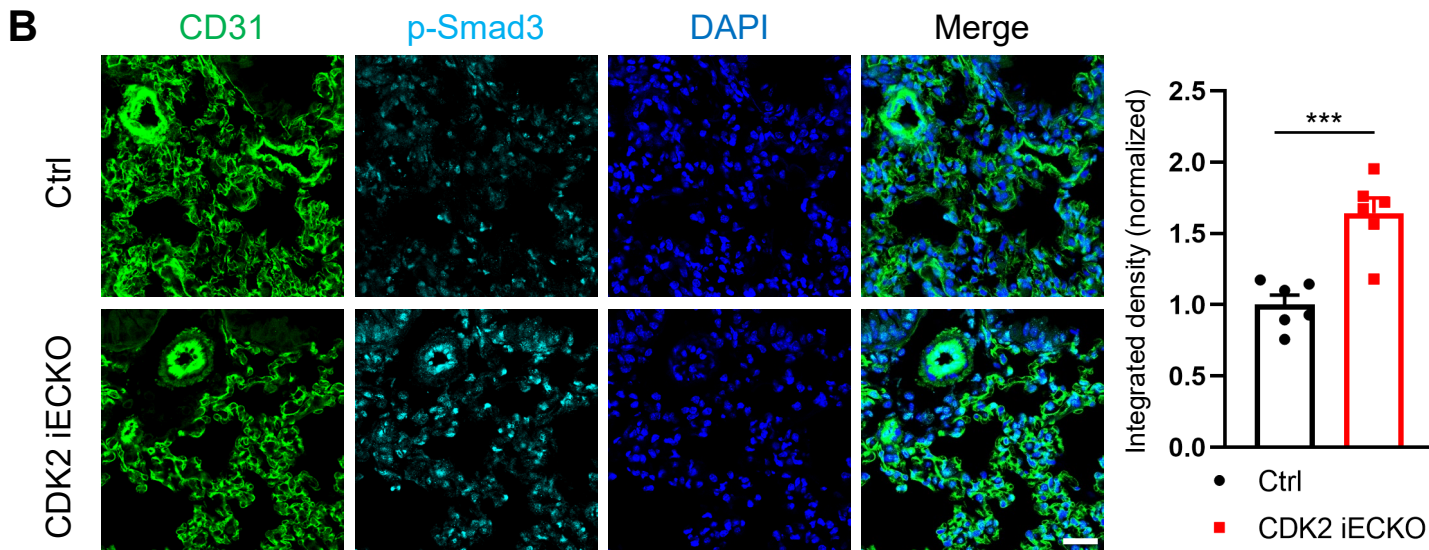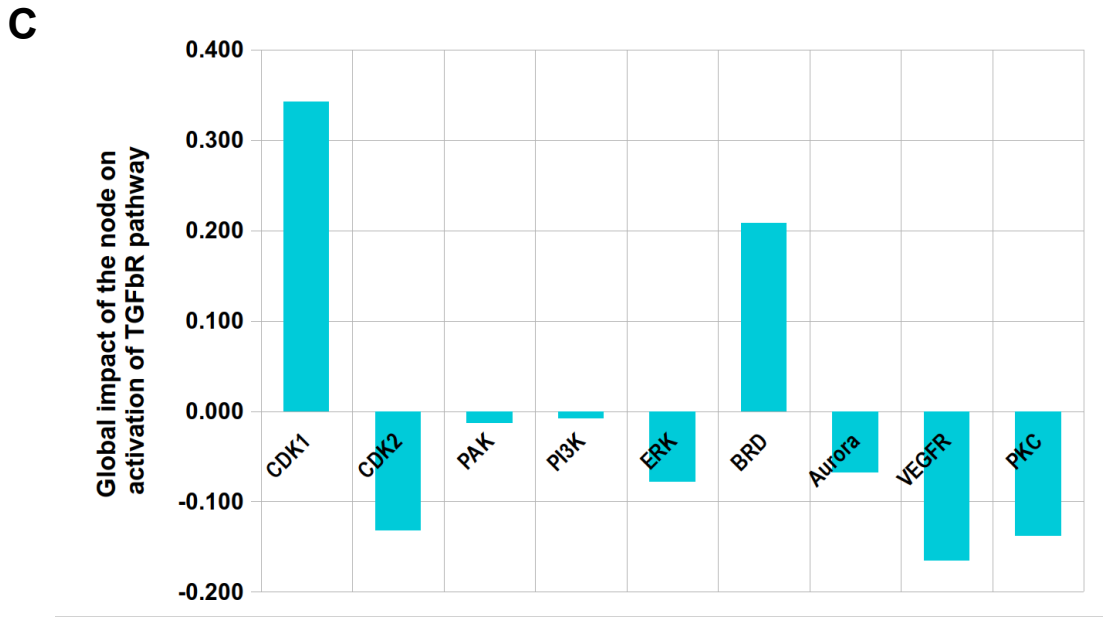

**Figure S5**

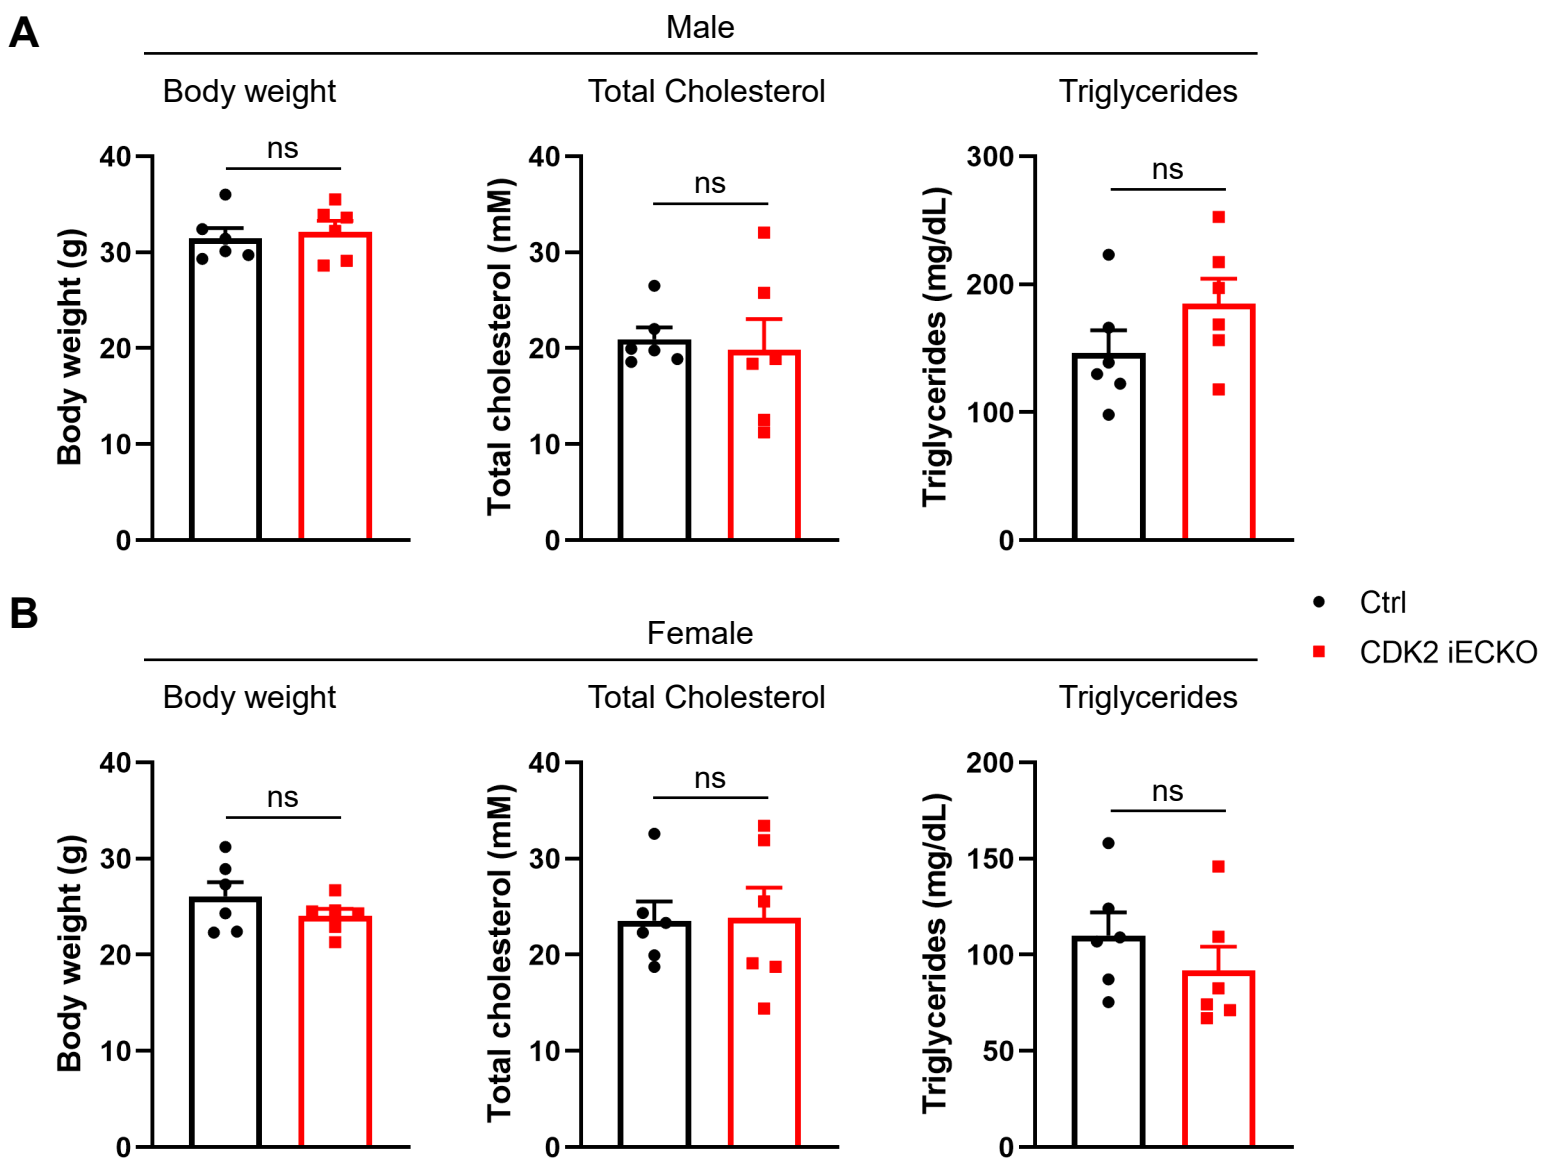



## Supplementary Tables

All supplementary tables are separate Excel files. Below are the table captions.

**Table S1.** The STV vectors determining phenotypic cell state transitions in original dataspace.

**Table S2.** The STV vectors determining phenotypic cell state transitions in L1000 dataspace.

**Table S3.** The cSTAR-inferred local response matrix  $r$ : mean values and standard deviations of the BMRA reconstructed local response matrix elements.

**Table S4.** The global response matrix: cSTAR predicted global response matrix  $-r^{-1}$ .

**Table S5.** List of secondary antibodies.
